# Supplementary material for: Approaching high charge carrier mobility by alkylating both donor and acceptor units at the optimized position in conjugated polymers
Source: Royal Society of Chemistry journal article supplement (doi:10.1039/c6py00469e), 2016-01-01

## Supporting Information

### Approaching high charge carrier mobility by alkylating both donor and acceptor units at optimized position in conjugated polymers

Dong Gao,<sup>†ab</sup> Kui Tian,<sup>†ab</sup> Weifeng Zhang,<sup>†a</sup> Jianyao Huang,<sup>a</sup> Zhihui Chen,<sup>ab</sup> Zupan Mao,<sup>ab</sup> and Gui Yu<sup>\*ab</sup>

<sup>a</sup> Beijing National Laboratory for Molecular Sciences, Institute of Chemistry, Chinese Academy of Sciences, Beijing 100190, P. R. China

<sup>b</sup> University of Chinese Academy of Sciences, Beijing 100049, P. R. China

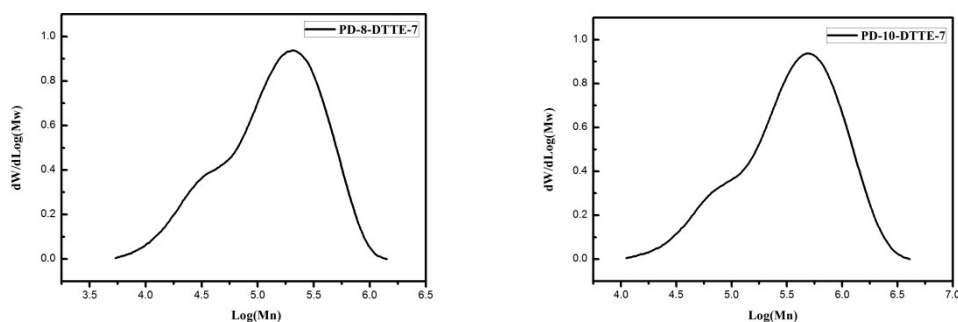

Fig. S1. GPC chromatograms of PD-n-DTTE-7.

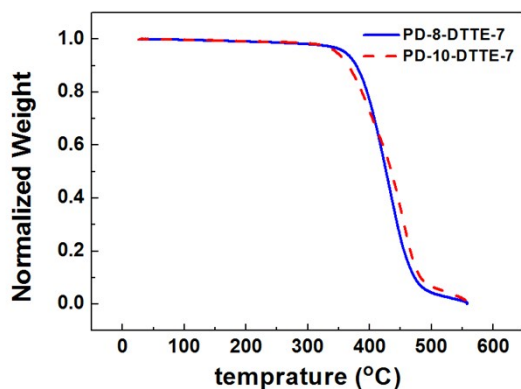

Fig. S2. TGA of PD-n-DTTE-7.

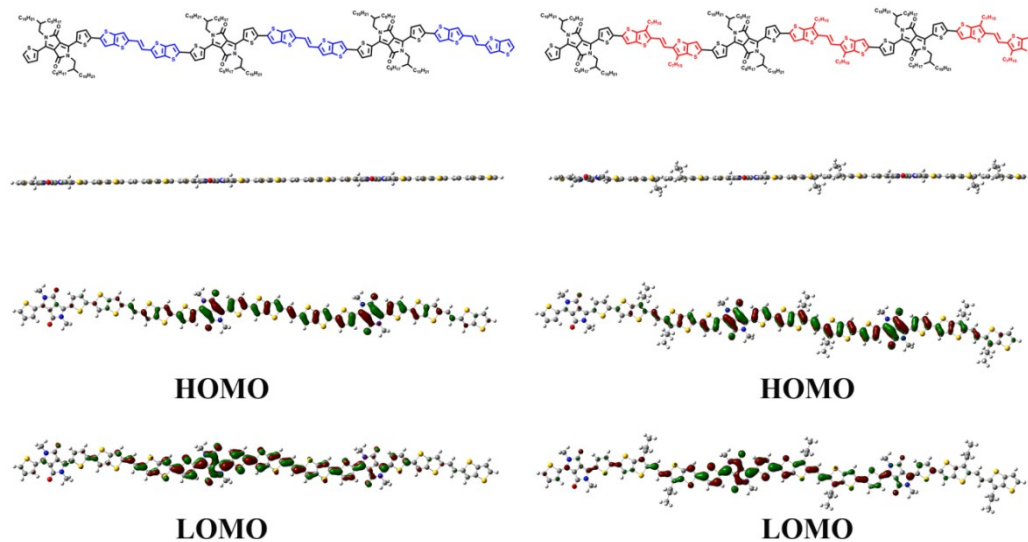

**Fig. S3.** Surface plots of HOMO (top) and LUMO (bottom) of the unalkylated trimers (left) and alkylated trimers (right).

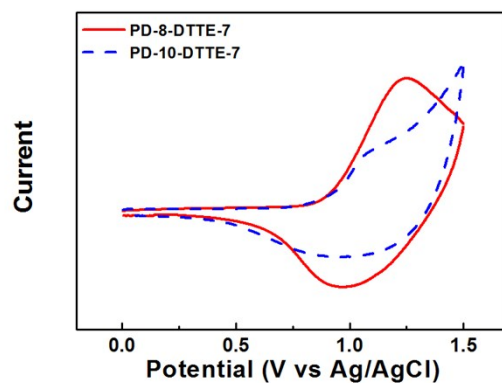

**Fig. S4.** Cyclic voltammogram of PD-n-DTTE-7 thin films.

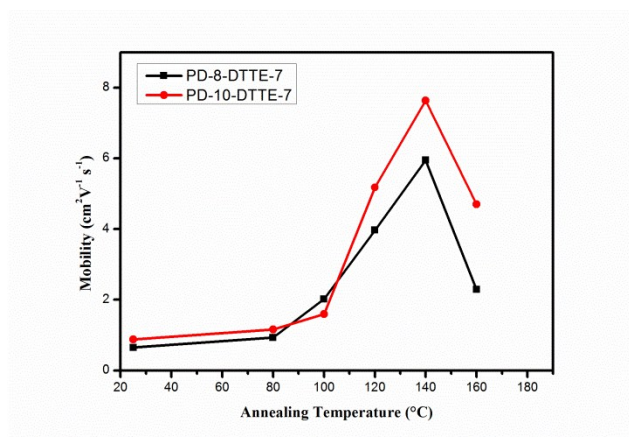

**Fig. S5.** OFET performances without annealing (25 °C) and with annealing at different temperatures.

$^1\text{H}$  and  $^{13}\text{C}$  NMR spectra

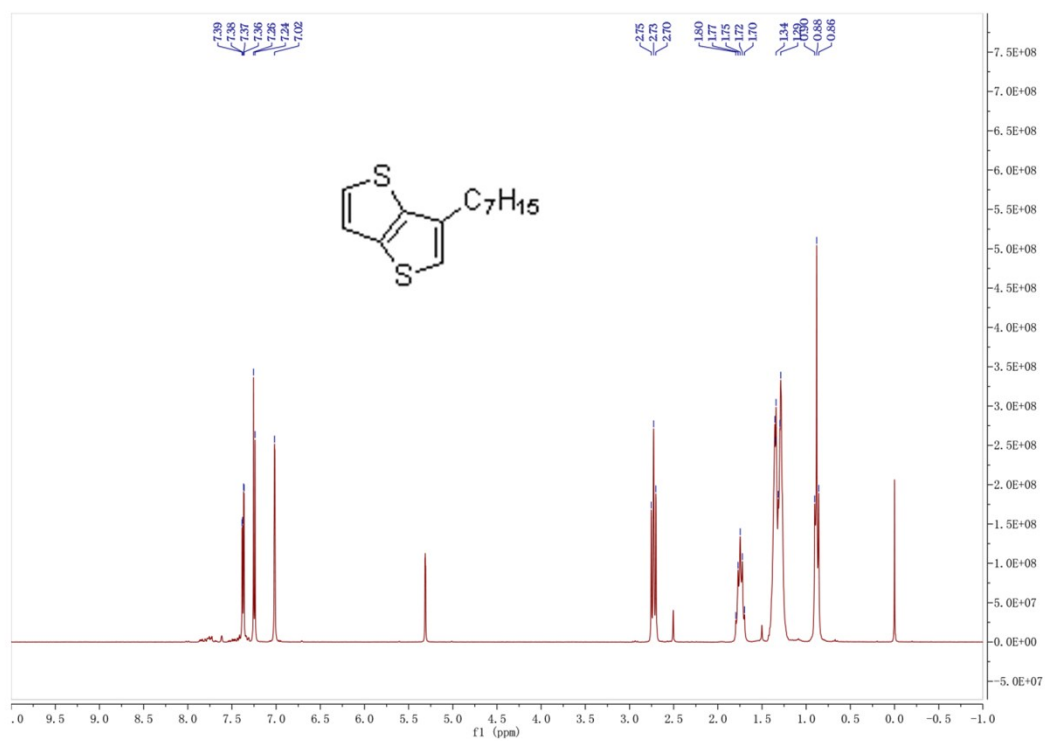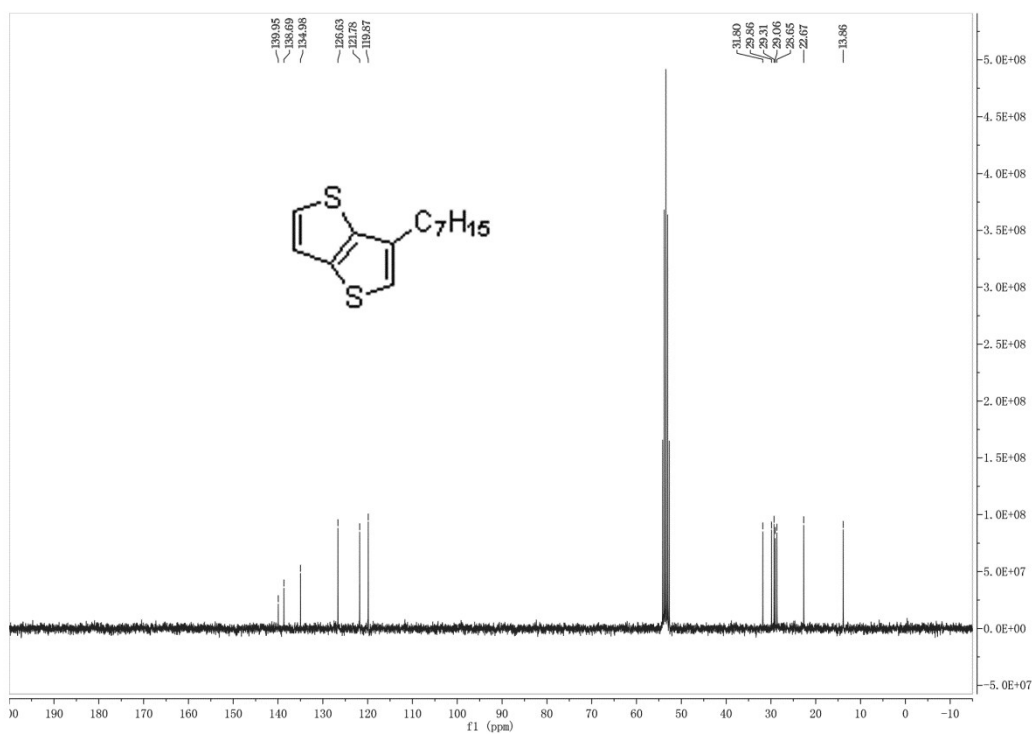

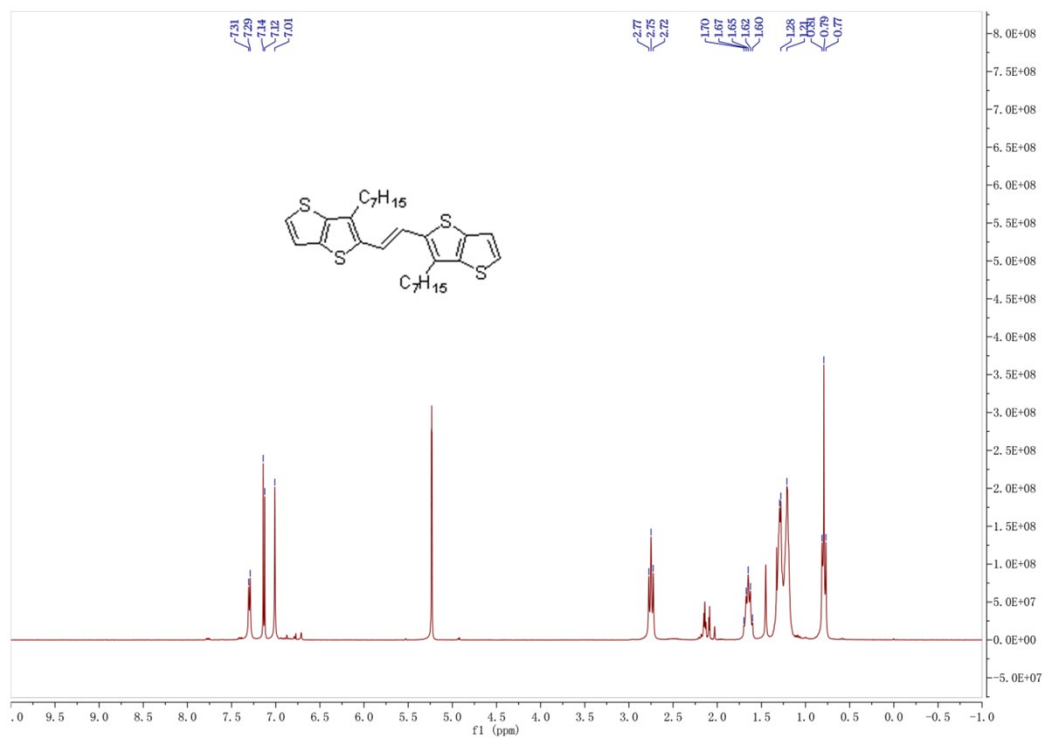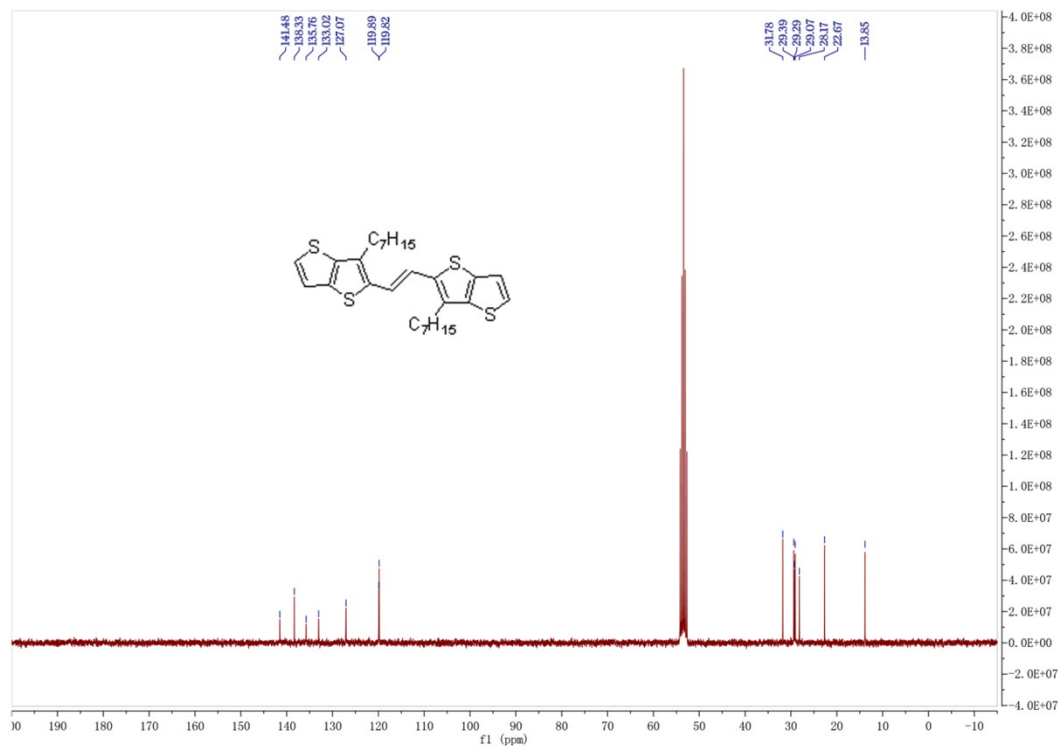

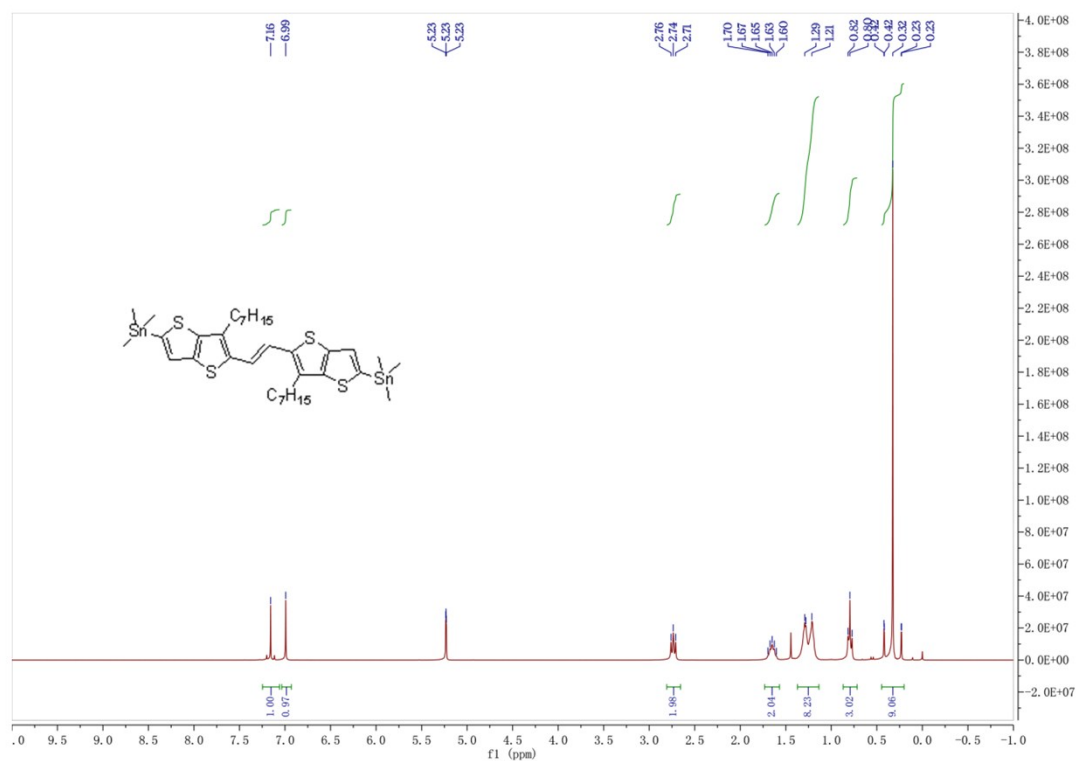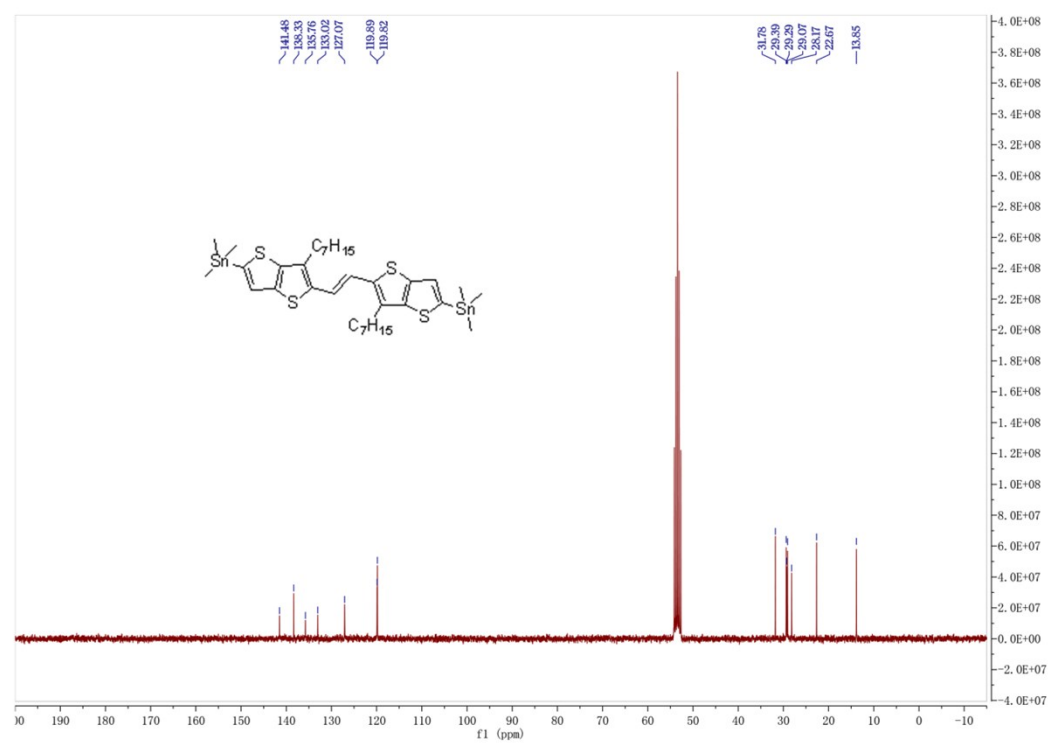

PD-8-DTTE-7.

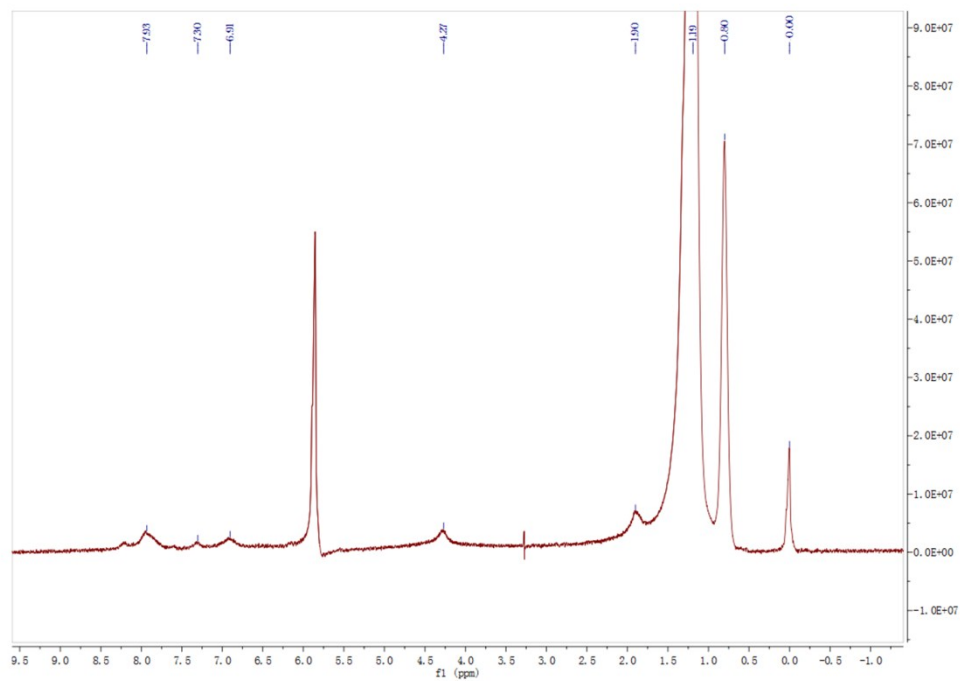

PD-10-DTTE-7

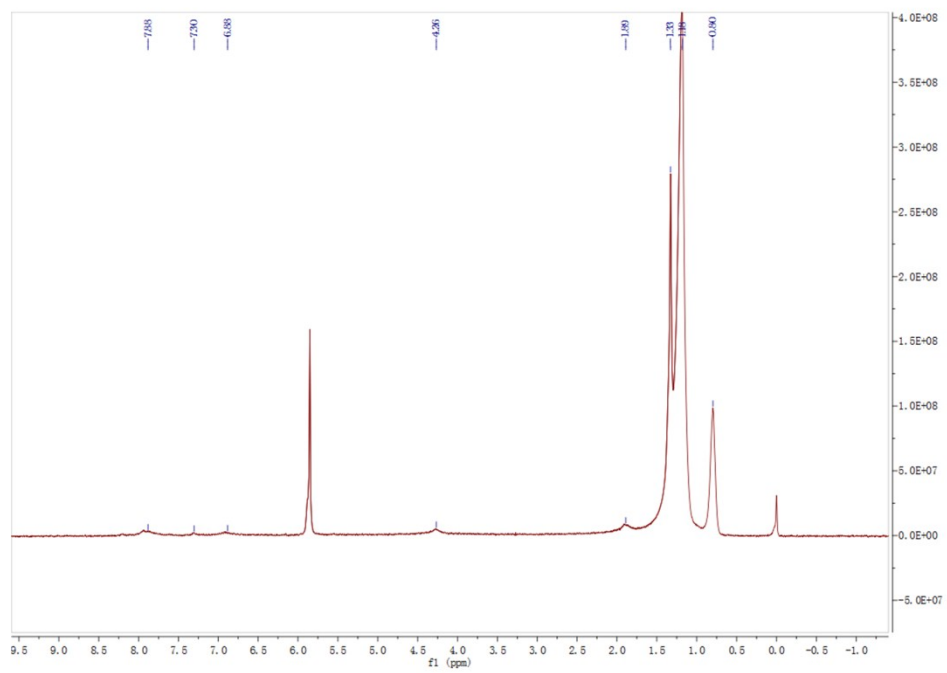

Supplement: c6py00469e1.pdf [file c6py00469e1.pdf]
